# Supplementary material for: Conformational, crystalline and rheological properties of poly(octadecyl-co-methyl acrylate) statistically random copolymers
Source: Royal Society of Chemistry journal article supplement (doi:10.1039/d2py01213h), 2023-01-01
Supplement: d2py01213h1.pdf [file d2py01213h1.pdf]

## Supporting Information

# Conformational, Crystalline and Rheological Properties of Poly(octadecyl-*co*-methyl acrylate) Statistically Random Copolymers

Xuejun Pan,<sup>1,3,†</sup> Weiling Wu,<sup>4,†</sup> Mo Zhu,<sup>1,†</sup> Jixian Yang,<sup>1</sup> Zhi-Chao Yan<sup>2\*</sup> and Lianwei Li<sup>1,\*</sup>

<sup>1</sup>College of Chemistry and Environmental Engineering, Shenzhen University, Shenzhen 518060, China

<sup>2</sup>School of Chemical Engineering and Light Industry, Guangdong University of Technology, Guangzhou 510006, China

<sup>3</sup>Department of Chemical Physics, University of Science and Technology of China, Hefei, Anhui 230026, China

<sup>4</sup>Shenzhen Key Laboratory of Polymer Science and Technology, Guangdong Research Center for Interfacial Engineering of Functional Materials, College of Materials Science and Engineering, Shenzhen University, Shenzhen 518055, China

\* To whom corresponding should be addressed:

Zhi-Chao Yan: zcyan@gdut.edu.cn; Lianwei Li: lianweili@szu.edu.cn

**Calculation of  $dn/dc$  Values for  $P(\text{ODA}_x\text{-stat-MA}_y)_{N_b}$  copolymers.** In this work, we used the classical additive rule to extract  $(dn/dc)_{\text{comb}}$  for  $P(\text{ODA}_x\text{-stat-MA}_y)_{N_b}$  copolymers. Before calculating  $(dn/dc)_{\text{comb}}$ ,  $dn/dc$  of homopolymer PMA and PODA must be obtained first. First of all, for PtBA, the precursor chain of PMA, we already know that its real  $dn/dc$  value is 0.052 according to previous work.<sup>1</sup> Therefore, by using QD-SEC, we can know the absolute molar mass of PtBA, through which we can calculate the true  $N_b$  of PMA, thus we can know the true molar mass of the corresponding homopolymer PMA and PODA. Furthermore, we do know that the output value of  $M_w$  by QD-SEC is inversely proportional to the input value of  $(dn/dc)_{\text{comb}}$  during the analysis process of QD-SEC data, which further leads to

$$M_{LS} = \Gamma / [(dn/dc)_{\text{comb}}] \quad (1)$$

where the pre-factor  $\Gamma$  is a feature parameter and  $\Gamma$  possesses a unique numerical value for a specific sample. More importantly,  $\Gamma$  for each  $P(\text{ODA}_x\text{-stat-MA}_y)_{N_b}$  sample can be easily determined in QD-SEC measurement. By using equation 1, we can characterize PMA and PODA and calculate their  $dn/dc$  as 0.076 and 0.071 respectively, which are very close to the values given in literature and polymer handbook.<sup>2-3</sup> In addition, the expression of copolymer  $(dn/dc)_{\text{comb}}$  value can be expressed as follows:

$$\begin{aligned} (dn/dc)_{\text{comb}} &= wt\%_{\text{PMA}} (dn/dc)_{\text{PMA}} + wt\%_{\text{PODA}} (dn/dc)_{\text{PODA}} \\ &= \frac{M_{\text{MA}}(1-x)}{M_{\text{MA}}(1-x) + M_{\text{ODA}}x} (dn/dc)_{\text{PMA}} + \frac{M_{\text{ODA}}x}{M_{\text{MA}}(1-x) + M_{\text{ODA}}x} (dn/dc)_{\text{PODA}} \end{aligned} \quad (2)$$

$M_{\text{MA}}$ : the molar mass of a monomer unit on backbone, and  $M_{\text{MA}} = 86$  g/mol.

$M_{\text{ODA}}$ : the molar mass of sidechain (ODA) and  $M_{\text{ODA}} = 324$  g/mol.

$x$ : the molar fraction of ODA.

$wt\%_{\text{PMA}}$ : the mass percentage of PMA.

$wt\%_{\text{PODA}}$ : the mass percentage of PODA.

$(dn/dc)_{\text{comb}}$ : the refractive index increment of  $P(\text{ODA}_x\text{-stat-MA}_y)_{N_b}$  polymers.

$(dn/dc)_{\text{PMA}}$ : the refraction index increment of PMA, and  $(dn/dc)_{\text{PMA}} = 0.076$  mL/g.

$(dn/dc)_{\text{PODA}}$ : the refraction index increment of PODA, and  $(dn/dc)_{\text{graft}} = 0.071$  mL/g.

By using equation 2, we can calculate  $(dn/dc)_{\text{comb}}$  of each sample. And inputting the corresponding  $(dn/dc)_{\text{comb}}$  value into QD-SEC analysis software, we can get the corresponding absolute parameters of each sample. In addition to the molar mass given by QD-SEC, by using the  $x$  calculated by  $^1\text{H-NMR}$  spectrum analysis, we can also calculate the theoretical molar mass based on  $^1\text{H-NMR}$  information through the Equation 3:

$$M_{\text{NMR}} = N_b [M_{\text{MA}}(1-x) + M_{\text{ODA}}x] \quad (3)$$

All parameter information is summarized in Table S2-4.

**Table S1.** Summarized molecular parameters of four PtBA precursors determined by QD-SEC.

| Sample               | $M_{w-LS}$<br>/(g/mol) | $M_{p-LS}$<br>/(g/mol) | $\langle M_w/M_n \rangle$ | $N_b$ |
|----------------------|------------------------|------------------------|---------------------------|-------|
| PtBA <sub>345</sub>  | $4.05 \times 10^4$     | $4.12 \times 10^4$     | 1.08                      | 345   |
| PtBA <sub>1100</sub> | $1.25 \times 10^5$     | $1.41 \times 10^5$     | 1.13                      | 1100  |
| PtBA <sub>1740</sub> | $2.17 \times 10^5$     | $2.23 \times 10^5$     | 1.14                      | 1740  |
| PtBA <sub>2750</sub> | $3.49 \times 10^3$     | $3.52 \times 10^5$     | 1.23                      | 2750  |

**Table S2.** Summarized molecular parameters of P(ODA<sub>x</sub>-stat-MA<sub>y</sub>)<sub>345</sub> polymers by QD-SEC and <sup>1</sup>H-NMR.

| P(ODA <sub>x</sub> -stat-MA <sub>y</sub> ) <sub>345</sub> | $M_{p-NMR}$<br>/(g/mol) | $M_{p-LS}$<br>/(g/mol) | $\langle M_w/M_n \rangle$ | $R_{\eta}/nm$ | $[\eta]$ /(mL/g) |
|-----------------------------------------------------------|-------------------------|------------------------|---------------------------|---------------|------------------|
| 0                                                         | $2.97 \times 10^4$      | $2.97 \times 10^4$     | 1.06                      | 4.46          | 21.80            |
| 0.29                                                      | $4.65 \times 10^4$      | $5.31 \times 10^5$     | 1.14                      | 5.68          | 25.95            |
| 0.47                                                      | $6.14 \times 10^4$      | $6.84 \times 10^4$     | 1.12                      | 6.23          | 25.60            |
| 0.68                                                      | $7.92 \times 10^4$      | $8.58 \times 10^4$     | 1.12                      | 6.72          | 24.72            |
| 0.87                                                      | $8.83 \times 10^5$      | $1.01 \times 10^5$     | 1.08                      | 6.97          | 24.08            |
| 0.99                                                      | $1.11 \times 10^5$      | $1.11 \times 10^5$     | 1.10                      | 7.27          | 23.45            |

**Table S3.** Summarized molecular parameters of P(ODA<sub>x</sub>-stat-MA<sub>y</sub>)<sub>1100</sub> polymers by QD-SEC and <sup>1</sup>H-NMR.

| P(ODA <sub>x</sub> -stat-MA <sub>y</sub> ) <sub>1100</sub> | $M_{p-NMR}$<br>/(g/mol) | $M_{p-LS}$<br>/(g/mol) | $\langle M_w/M_n \rangle$ | $R_{\eta}/nm$ | $[\eta]$<br>/(mL/g) |
|------------------------------------------------------------|-------------------------|------------------------|---------------------------|---------------|---------------------|
| 0                                                          | $9.46 \times 10^4$      | $9.07 \times 10^4$     | 1.07                      | 12.07         | 53.52               |
| 0.13                                                       | $1.29 \times 10^5$      | $1.56 \times 10^5$     | 1.15                      | 11.45         | 65.93               |
| 0.39                                                       | $1.98 \times 10^5$      | $2.07 \times 10^5$     | 1.08                      | 13.37         | 64.23               |
| 0.45                                                       | $2.11 \times 10^5$      | $2.42 \times 10^5$     | 1.09                      | 12.73         | 66.04               |
| 0.81                                                       | $3.07 \times 10^5$      | $3.38 \times 10^5$     | 1.09                      | 14.58         | 60.64               |
| 0.99                                                       | $3.53 \times 10^5$      | $3.80 \times 10^5$     | 1.08                      | 15.15         | 58.30               |

**Table S4.** Summarized molecular parameters of  $P(\text{ODA}_x\text{-stat-MA}_y)_{1740}$  polymers by QD-SEC and  $^1\text{H-NMR}$ .

| $P(\text{ODA}_x\text{-stat-MA}_y)_{1740}$ | $M_{\text{P-NMR}}$<br>/(g/mol) | $M_{\text{P-LS}}$<br>/(g/mol) | $\langle M_w/M_n \rangle$ | $R_{\eta}/\text{nm}$ | $[\eta]$<br>/(mL/g) |
|-------------------------------------------|--------------------------------|-------------------------------|---------------------------|----------------------|---------------------|
| 0                                         | $1.50 \times 10^5$             | $1.53 \times 10^5$            | 1.11                      | 13.46                | 68.32               |
| 0.23                                      | $2.46 \times 10^5$             | $2.39 \times 10^5$            | 1.18                      | 15.13                | 86.42               |
| 0.46                                      | $3.41 \times 10^5$             | $3.27 \times 10^5$            | 1.19                      | 16.13                | 82.91               |
| 0.65                                      | $4.20 \times 10^5$             | $4.31 \times 10^5$            | 1.16                      | 17.48                | 79.58               |
| 0.86                                      | $5.05 \times 10^5$             | $5.00 \times 10^5$            | 1.15                      | 18.36                | 77.95               |
| 0.97                                      | $5.53 \times 10^5$             | $5.58 \times 10^5$            | 1.15                      | 18.89                | 74.87               |

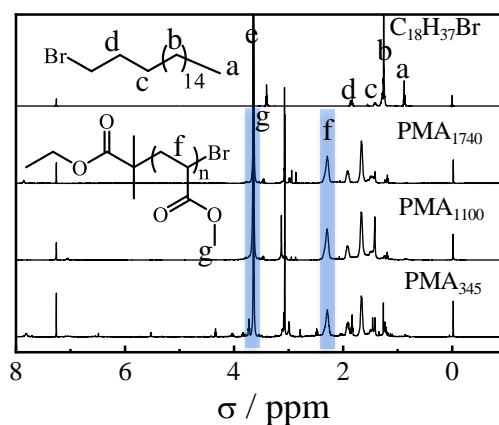

**Figure S1.**  $^1\text{H-NMR}$  spectrum of polymethyl acrylate (PMA) with different backbone length ( $N_b=345, 1100, 1740$ ) and side chain ( $\text{C}_{18}\text{H}_{37}\text{Br}$ ) in  $\text{CDCl}_3$ .

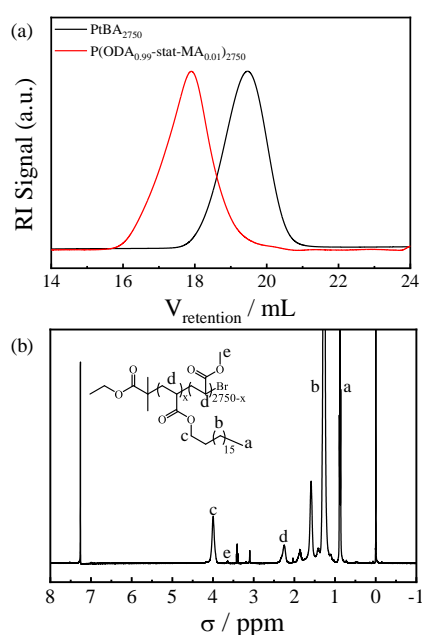

**Figure S2.** (a) SEC curves of  $\text{PtBA}_{2750}$  and  $\text{P}(\text{ODA}_{0.99}\text{-stat-MA}_{0.01})_{2750}$  SEC. (b)  $^1\text{H-NMR}$

spectra of P(ODA<sub>0.99</sub>-stat-MA<sub>0.01</sub>)<sub>2750</sub> in CDCl<sub>3</sub>.

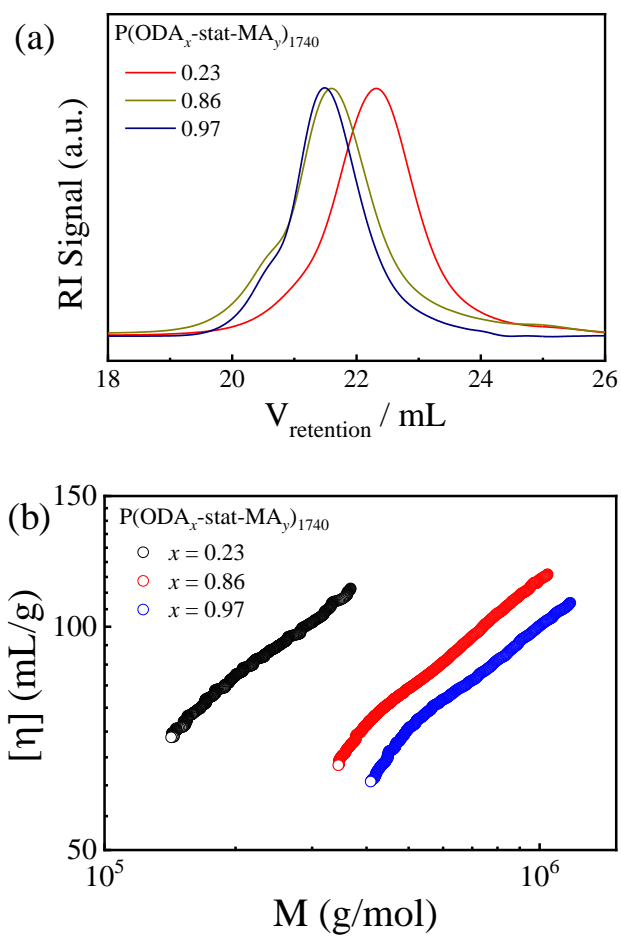

**Figure S3.** (a) SEC curves of P(ODA<sub>x</sub>-stat-MA<sub>y</sub>)<sub>1740</sub> with three different  $x$  ( $x = 0.23, 0.86, 0.97$ ). (b) Molar mass ( $M$ ) dependences of intrinsic viscosity ( $[\eta]$ ) for P(ODA<sub>x</sub>-stat-MA<sub>y</sub>)<sub>1740</sub> with three different  $x$  ( $x = 0.23, 0.86, 0.97$ ).

In Figures S4a-e, the zero-shear viscosity was obtained by averaging the points in the shear rate independent regime, while the zero-shear viscosity in figure S4f was obtained by the Carreau fitting.<sup>4</sup>

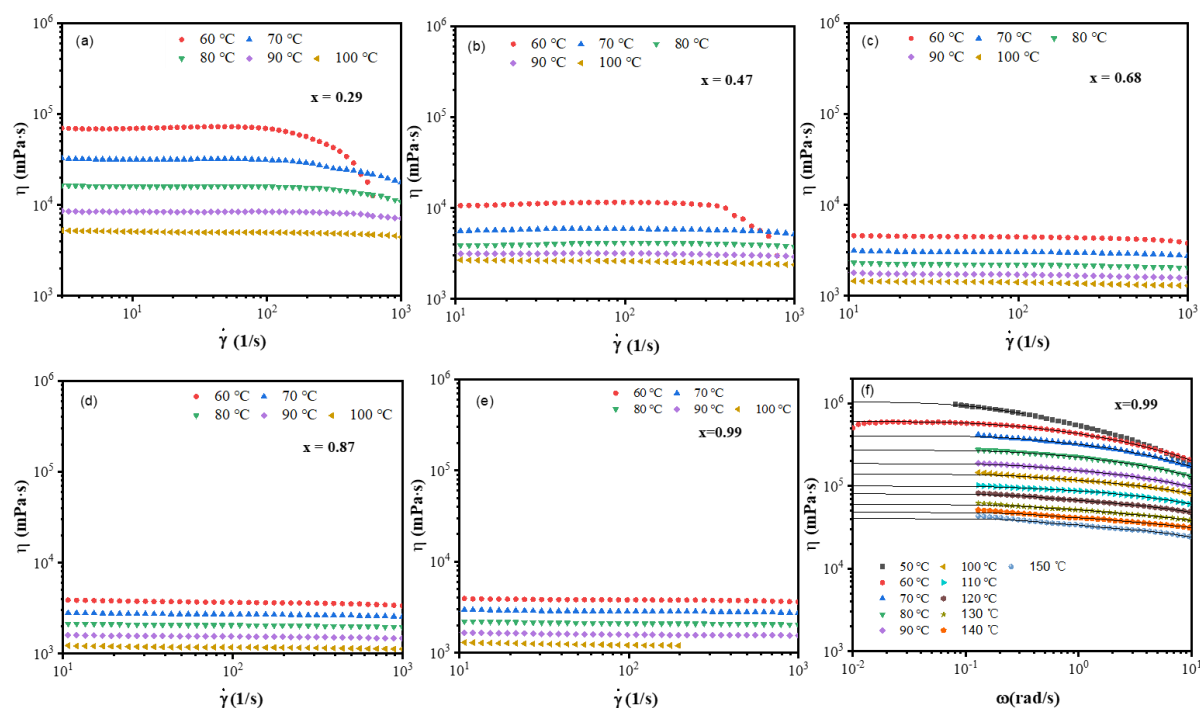

**Figure S4.** Viscosity ( $\eta$ ) as a function of shear rate ( $\dot{\gamma}$ ) for samples with (a) P(ODA<sub>0.29</sub>-stat-MA<sub>0.71</sub>)<sub>345</sub>, (b) P(ODA<sub>0.47</sub>-stat-MA<sub>0.53</sub>)<sub>345</sub>, (c) P(ODA<sub>0.68</sub>-stat-MA<sub>0.32</sub>)<sub>345</sub>, (d) P(ODA<sub>0.87</sub>-stat-MA<sub>0.13</sub>)<sub>345</sub>, (e) P(ODA<sub>0.99</sub>-stat-MA<sub>0.01</sub>)<sub>345</sub> and (f) Viscosity ( $\eta$ ) as a function of frequency ( $\omega$ ) for sample of P(ODA<sub>0.99</sub>-stat-MA<sub>0.013</sub>)<sub>2750</sub>.

## References

1. Pan, X.; Ishaq, M. W.; Umair, A.; Ali, M. W.; Li, L., Evolution of Single Chain Conformation for Model Comb-Like Chains with Grafting Density Ranging from 0 to similar to 100% in Dilute Solution. *ACS Macro Letters* **2019**, *8* (12), 1535-1540.
2. Jordan Jr, E. F., Heterogeneity Parameters by Light Scattering for Statistical Copolymers Incorporating Long Side-chain Comonomers. *J Polym Sci Pol Chem* **1968**, *6* (8), 2209-2219.
3. Brandrup, J.; Immergut, E. H.; Grulke, E. A.; Abe, A.; Bloch, D. R., (Eds.), *Polymer Handbook*. Wiley: New York, **1999**.
4. Macosko, C. W.; Larson, R. G., *Rheology: Principles, Measurements, and Applications*. Wiley: New York, **1994**.
